# Supplementary material for: Feeding on the Fruit Waste Orange Bagasse Modifies Immature Protein Content, Body Weight, Scent Bouquet Composition, and Copula Duration in Males of a Tephritid Frugivorous Fly
Source: MDPI journal article supplement (doi:10.3390/biology12050739), 2023-05-19
Supplement: s1 [file s1]

Supplementary Table S1. Volatile compounds of sexually mature *A. ludens* males from two larval diets.

| Diet                | Volatile Compound                                                      | Retention time (min) | Average abundance (counts/1 million) | Reproducibility |
|---------------------|------------------------------------------------------------------------|----------------------|--------------------------------------|-----------------|
| Artificial diet     | (Z)-3-Nonen-1-ol                                                       | 11.168               | 0.857                                | 16/16           |
|                     | (Z,Z)-3,6-Nonadien-1-ol                                                | 11.2                 | 1.790                                | 16/16           |
|                     | $\alpha$ -Bergamotene                                                  | 14.042               | 0.758                                | 16/16           |
|                     | 1-Cyclopentanecarboxylic acid, 4-isopropylidene-2-vinyl-, methyl ester | 14.393               | 0.412                                | 16/16           |
|                     | (Z,E)- $\alpha$ -Farnesene                                             | 14.458               | 0.104                                | 16/16           |
|                     | 4-methylene-2,8,8-trimethyl-2-vinyl-bicyclo[5.2.0]nonane               | 14.5                 | 0.194                                | 14/16           |
|                     | (E,E)- $\alpha$ -Farnesene                                             | 14.587               | 4.186                                | 16/16           |
|                     | Suspensolide                                                           | 14.63                | 0.217                                | 16/16           |
|                     | $\beta$ -Bisabolene                                                    | 14.672               | 0.218                                | 16/16           |
|                     | trans-Sesquisabinene hydrate                                           | 14.721               | 0.085                                | 14/16           |
|                     | 1,4-dimethyl-3-(2-methyl-1-propene-1-yl)-4-vinyl-1-Cycloheptene        | 14.843               | 0.106                                | 13/16           |
|                     | Anastrephin                                                            | 15.4                 | 1.532                                | 16/16           |
|                     | Epianastrephin                                                         | 15.506               | 4.039                                | 16/16           |
| Orange bagasse diet | (Z)-3-Nonen-1-ol                                                       | 11.168               | 0.746                                | 16/16           |
|                     | (Z,Z)-3,6-Nonadien-1-ol                                                | 11.2                 | 2.047                                | 16/16           |
|                     | $\alpha$ -Bergamotene                                                  | 14.042               | 1.000                                | 16/16           |
|                     | $\beta$ -Sesquiphellandrene                                            | 14.099               | 0.107                                | 16/16           |
|                     | $\beta$ -Santalene                                                     | 14.294               | 0.141                                | 16/16           |
|                     | 1-Cyclopentanecarboxylic acid, 4-isopropylidene-2-vinyl-, methyl ester | 14.393               | 0.545                                | 16/16           |
|                     | (Z,E)- $\alpha$ -Farnesene                                             | 14.458               | 0.146                                | 16/16           |
|                     | 4-methylene-2,8,8-trimethyl-2-vinyl-bicyclo[5.2.0]nonane               | 14.5                 | 0.224                                | 16/16           |
|                     | (E,E)- $\alpha$ -Farnesene                                             | 14.587               | 5.205                                | 16/16           |
|                     | Suspensolide                                                           | 14.63                | 0.260                                | 16/16           |
|                     | $\beta$ -Bisabolene                                                    | 14.672               | 0.292                                | 16/16           |
|                     | trans-Sesquisabinene hydrate                                           | 14.721               | 0.108                                | 16/16           |
|                     | 1,4-dimethyl-3-(2-methyl-1-propene-1-yl)-4-vinyl-1-Cycloheptene        | 14.843               | 0.109                                | 16/16           |
|                     | 4-Cyclohexylidenebutyraldehyde                                         | 14.864               | 0.137                                | 16/16           |
|                     | (Z)- $\alpha$ -Bisabolene                                              | 14.926               | 0.071                                | 13/16           |
|                     | 3,6-diethyl-3,6-dimethyl-, trans-tricyclo[3.1.0.0(2,4)]hexane          | 15.324               | 0.099                                | 16/16           |
|                     | Anastrephin                                                            | 15.4                 | 1.852                                | 16/16           |
|                     | Anastrephin derivative                                                 | 15.466               | 0.044                                | 15/16           |
|                     | Epianastrephin                                                         | 15.506               | 4.669                                | 16/16           |
|                     | Santalol isomer                                                        | 15.957               | 0.171                                | 15/16           |
|                     | Isolongifolol                                                          | 16.062               | 0.118                                | 15/16           |
